# Supplementary material for: Selection against Heteroplasmy Explains the Evolution of Uniparental Inheritance of Mitochondria
Source: PLOS journal article supplement (doi:10.1371/journal.pgen.1005112), 2015-04-16
Supplement: S47 (10.1371/journal.pgen.1005112.s047) [file journal.pgen.1005112.s047]

## **S1 Model: Non-neutral models**

### ***Deleterious model***

Let  $s_d$  be the selection coefficient of the deleterious mutation (where the fitness of a cell that is homoplasmic for mutant mitochondria is  $1 - s_d$ ). Assuming that the cost imposed by mutant mitochondria can be modeled by a concave function, the fitness of a cell with  $i$  mutant mitochondria is given by

$$w_d(i) = w(i) \left( 1 - s_d \left( \frac{i}{n} \right)^2 \right), \text{ where } w(i) \text{ is determined by either equation (1) or (3).}$$

### ***Advantageous model***

Again, we generate  $w(i)$  using equation (1) or equation (3). We let  $s_a$  be the selection coefficient of the deleterious mutation (where the fitness of a cell that is homoplasmic for wild type mitochondria is  $1 - s_a$ ). Since there are no data as to how fitness increases as advantageous mitochondria accumulate, we model the increase in fitness using a concave function and a convex function. If we assume that advantageous mutations convey fitness benefits consistent with a concave function, the fitness of a cell with  $i$  mutant mitochondria is given by

$$w_a(i) = w(i) \left( 1 - s_a \left( \frac{n-i}{n} \right)^2 \right).$$

If we assume that fitness accumulates as a convex function of the number of mutant mitochondria, then the fitness of a cell with  $i$  mutant mitochondria is given by

$$w_a(i) = w(i) \left( 1 - s_d \sqrt{\frac{n-i}{n}} \right).$$
