# Supplementary material for: Selection against Heteroplasmy Explains the Evolution of Uniparental Inheritance of Mitochondria
Source: PLOS journal article supplement (doi:10.1371/journal.pgen.1005112), 2015-04-16
Supplement: S50 (10.1371/journal.pgen.1005112.s050) [file journal.pgen.1005112.s050]

#### S4 Model: Mitosis

In this scenario, we add mitosis to the life-cycle. Mitosis mimics the continual turnover of mitochondria that occurs within a cell. (Mitochondria form interconnected networks that continually undergo fission/fusion.) We examine how the model behaves when mitosis is inserted before selection and when it is inserted after selection. To model mitosis, we sample  $n$  mitochondria with replacement from a cell that contains  $i$  mutant (out of  $n$ ) mitochondria. We denote the probability of sampling  $i^*$  mutant mitochondria with replacement from a cell with  $i$  mutant mitochondria as  $X(i^*; n, i/n)$ . When mitosis occurs before selection, the post-mitosis population is determined by

$$P(\mathbf{M}^{t, \tau_4} = (i^*, U_1 B_2)) = \sum_{i=0}^n X(i^*; n, \frac{i}{n}) P(\mathbf{M}^{t, \tau_3} = (i, U_1 B_2)).$$

When mitosis occurs after selection, the post-mitosis population is given by

$$P(\mathbf{M}^{t, \tau_6} = (i^*, U_1 B_2)) = \sum_{i=0}^n X(i^*; n, \frac{i}{n}) P(\mathbf{M}^{t, \tau_5} = (i, U_1 B_2)).$$
